1 Bayogenin 3-O-Cellobioside is a novel non-cultivar specific anti-blast metabolite  
2 produced in rice in response to *Pyricularia oryzae* infection

3

4 Justice Norvienyeku<sup>1,2†</sup>, Lili Lin<sup>1,2†</sup>, Abdul Waheed<sup>1,2</sup>, Xiaomin Chen<sup>1,2</sup>, Jiandong  
5 Bao<sup>1,2</sup>, Ammarah Shabbir<sup>1,2</sup>, Lianyu Lin<sup>1,2</sup>, Zhenhui Zhong<sup>1,2</sup>, Wajjiha Batool<sup>1,2</sup>,  
6 Sami Rukaiya Aliyu<sup>1,2</sup>, Jie Zhou<sup>1,2</sup>, Guodong Lu<sup>1,2</sup>, Zonghua Wang<sup>1,3\*</sup>

7

8 <sup>1</sup>State Key Laboratory for Ecological Pest Control of Fujian and Taiwan Crops, College of  
9 Life Science, Fujian Agriculture and Forestry University, Fuzhou, 350002, China

10 <sup>2</sup>Fujian University Key Laboratory for Plant-Microbe Interaction, College of Plant Protection,  
11 Fujian Agriculture and Forestry University, Fuzhou, 350002, China

12 <sup>3</sup>Institute of Oceanography, Minjiang University, Fuzhou, 350108, China

### 13 **Abstract**

14 Rice cultivars from *japonica* and *indica* lineage possess differential resistance against  
15 blast fungus on an account genetic divergence. Whether different rice cultivars also  
16 show distinct metabolomic changes in response to *P. oryzae*, and their role in host  
17 resistance, are poorly understood. Here, we examine the responses of six different rice  
18 cultivars from *japonica* and *indica* lineage challenged with *P. oryzae*. Both  
19 susceptible and resistant rice cultivars expressed several metabolites exclusively  
20 during *P. oryzae* infection, including the saponin Bayogenin 3-O-cellobioside.  
21 Bayogenin 3-O-cellobioside level in infected rice directly correlated with their  
22 resistant attributes. These findings reveal, for the first time to our knowledge that  
23 besides oat, other grass plants including rice produces protective saponins. Our study  
24 provides insight into the role of pathogen-mediated metabolomics-reprogramming in  
25 host immunity. The correlation between Bayogenin 3-O-Cellobioside levels and blast  
26 resistance suggests that engineering saponin expression in cereal crops represents an  
27 attractive and sustainable disease control strategy.

28



30

## Introduction

31 Rice blast disease accounts for yield losses that could feed about 60 million rice  
32 consumers annually(1). *Pyricularia oryzae* (Syn: *Magnaporthe oryzae*), the fungus  
33 that causes rice blast disease(2), is ubiquitously present in all rice-producing regions  
34 across the globe. In addition to rice, blast fungus can infect wheat, barley, millet,  
35 sorghum, rye, and other cultivated as well as non-cultivated grass plants, and is  
36 therefore considered one of the most important plant pathogens (3).

37 Rice blast fungus initiates infection by producing asexual spores (conidia) which  
38 disperse and attach onto healthy host tissues (4). In favorable conditions, the spore  
39 propagule (inoculum) germinates and produces a short hyphae-like structure typically  
40 from the apical cell called germ tube which later differentiates into a bulbous  
41 infectious structure known as appressoria (5). The appressoria further differentiates  
42 into rigid and robust penetration structure (penetration-peg) which is engaged by the  
43 blast pathogen to physically rupture the cuticle of susceptible host plants for  
44 successful invasion, colonization of host cells and the manifestation of blast  
45 symptoms (6, 7).

46 Current rice blast control strategies rely heavily on the use of rice cultivars with  
47 inherent basal resistance against the pathogen, as well as the breeding of resistant  
48 (R)-gene aided cultivars including CO39, Pi-b, Pi-4b, Pi-a, Pi-9, Piz-t, Pi-pita, Pi-gm ,  
49 Pi9, Pi2, among others (8-10). However, rice blast evolves rapidly to overcome  
50 R-gene supported resistance (11), and inherent basal resistance does not offer full  
51 immunity against blast fungus. Rice cultivars from *japonica* and *indica* sub-species  
52 possess differential resistance against blast fungus, with *japonica* rice mainly pose  
53 inherent resistance whereas *indica* rice poses R-gene mediated resistance (9).  
54 Although rice-specific secondary metabolites (phytochemicals) such as oryzalexins,  
55 phytocassanes, momilactone, and sakuranetin can protect rice from bacterial and  
56 fungal pathogens, including blast fungus (12, 13), these compounds have not been

57 extensively exploited as potent defense molecules against blast pathogen, largely  
58 because most of these metabolites are cultivar-specific and were identified enhance in  
59 response to phytohormone treatment rather than pathogen treatment. Current advances  
60 in metabolomics technologies enable the identification of phytochemicals and defense  
61 signaling molecules that are induced in plant tissues during host-pathogen interactions.  
62 Here, we investigated how *P. oryzae*-mediated metabolome reprogramming affects  
63 the susceptibility or resistance of different rice cultivars to *P. oryzae*.

## 64 **Results**

### 65 **Raw leaf extracts from inoculated rice seedlings inhibit infectious development of** 66 ***P. oryzae***

67 Firstly, we confirmed the susceptibility and resistance of six different rice  
68 cultivars (CO39, LTH, NPB Pi-B, Pi-4B, and Pi-gm) from both *indica* and *japonica*  
69 lineage (supplementary table 1) to *P. oryzae*. Briefly, we spray-inoculated  
70 three-week-old seedlings with conidia suspensions prepared from the *P. oryzae*  
71 Guy11 strain, incubated them in a dark and humid chamber, and transferred them to a  
72 growth chamber. At 7-days post inoculation, we assessed the type and severity of  
73 lesions on leaf tissues according to a published rice blast lesion scoring index (14).  
74 We found that the CO39, NPB, and LTH cultivars were highly susceptible, with a  
75 higher number of severe blast lesions (type 4 and 5 lesions), whereas Pi-gm, Pi-4b,  
76 and Pi-b cultivars displayed moderate to complete immunity against blast fungus  
77 (Figure.1B).

78 We hypothesized that metabolites produced after inoculation with rice blast might  
79 inhibit infectious development of *P. oryzae*. To test this hypothesis, we extracted  
80 crude extracts from inoculated rice seedlings, as well as from non-inoculated controls.  
81 We used the crude leaf extracts to wash conidia from the *P. oryzae* Guy11 strain,  
82 prepared conidia suspensions, and inoculated a hydrophobic coverslip to induce  
83 appressorium formation *in vitro*. Crude extract from the untreated resistant cultivars  
84 inhibited conidia germination and appressorium formation, whereas crude extracts

85 from the untreated susceptible cultivars had no inhibition effect (Figure. 1C-D).  
86 However, in 5/6 cases, the crude leaf extracts from the inoculated seedlings inhibited  
87 germination and appressorium formation more than crude leaf extracts from the  
88 corresponding non-inoculated control seedlings (Figure. 1E-F). Thus, indicate the  
89 likely presence of anti-blast metabolites in crude extracts from both susceptible and  
90 resistant cultivars show increased production of upon inoculation *P. oryzae*.

91

92

93 **Resistant rice cultivars accumulate higher levels of Bayogenin 3-O-cellobioside**  
94 **upon inoculation with *P. oryzae***

95

96 To monitor the changes in rice seedlings due to *P. oryzae* infection, we performed  
97 metabolomic analysis of inoculated and non-inoculated rice cultivars. We  
98 spray-inoculated two-week-old susceptible (CO39, NPB, and LTH) and resistant  
99 (Pi-gm, Pi-4B, and Pi-B) rice seedlings with conidia suspensions along with  
100 non-inoculated controls (Figure.2A), harvested leaf tissues at 12-hours post  
101 inoculation, and extracted metabolites in methanol using QTOF-UPHPLC (see  
102 Methods). Also to ensure exclusion of fungi specific metabolites, we analyzed the  
103 metabolomes of *P. oryzae* at different developmental stages including vegetative  
104 growth (mycelium stage), conidia (aberrant conidia/ resting stage) and conidia  
105 germination and appressorium formation stage (infectious development stage) (see  
106 Methods, and (15). Principal Component Analysis (PCA) of the data revealed the  
107 reproducible identification of metabolites in at least five out of the seven independent  
108 repeats (Figure.2A).

109 To uncover disease-relevant metabolites from the whole-metabolome profiles, we  
110 developed a robust filtering system to diminish unwanted biological variables,  
111 background noise, and biologically insignificant metabolites (see Supplementary  
112 Fig.1a, Methods, and (15). We uncovered ~2121 metabolites in susceptible rice  
113 seedlings, and ~3450 metabolites in resistant rice seedlings (Supplementary Table 2a).  
114 Kyoto Encyclopedia of Genes and Genomes (KEGG) compound enrichment analysis

115 (16) revealed that 883 metabolites were produced exclusively in infected seedlings  
116 (Figure.2 A &B) and (Supplementary Figure.1b). Of these 883 metabolites, 705 were  
117 unknown. Of the 178 metabolites with a KEGG code, 18 were present in both  
118 susceptible and resistant rice cultivars after inoculation, 114 were present exclusively  
119 in the susceptible cultivars after inoculation, and 45 were solely present in the  
120 resistant cultivars after inoculation (Figure.2B- D).

121 To determine the function of the 18 metabolites present in both susceptible and  
122 resistant rice seedlings upon infection, we used their compound codes, chemical  
123 formulae and common names to search publicly available metabolite libraries,  
124 including KEGG compound, KEGG BRITE, PubChem Compound, The Human  
125 Metabolome Database, The Small Molecule Pathway Database, and The Toxin and  
126 Toxin Target Database (17). We found that 5/18 metabolites are known to be  
127 functional phytochemicals: Podorhizol beta-D-glucoside, Bayogenin 3-O-cellobioside,  
128 (+)-Syringaresinol O-beta-D-glucoside, 4-Methylsulfonylbutyl glucosinolate, and  
129 Dihydromyricetin (Figure.2E-F) and (Supplementary Figure. 3). Indeed, Podorhizol  
130 beta-D-glucoside and 4-Methylsulfonylbutyl glucosinolate are known to enhance  
131 plant immunity against diverse pathogens (18, 19).

132 Intriguingly, unlike the other four metabolites, the levels of Bayogenin  
133 3-O-cellobioside were relatively low in the inoculated, susceptible rice cultivars  
134 compared to in the inoculated, resistant group (Figure. 2 G-K). Furthermore, we  
135 observed that Bayogenin 3-O-cellobioside levels were about ~1000-fold higher in the  
136 completely resistant cultivar Pi-gm than in the moderately resistant cultivars Pi-4b  
137 and Pi-b (Figure.2K). Thus, Bayogenin 3-O-cellobioside levels increase specifically  
138 upon inoculation of rice seedlings with *P. oryzae* and directly correlate with the extent  
139 of resistance. Our results suggest that Bayogenin 3-O-cellobioside is a novel general  
140 defense molecule produced in response to rice blast fungus infection, in both  
141 susceptible and resistant rice cultivars.

142

143

144 **Glycosylated Bayogenin inhibits infectious development of *P. oryzae in vitro***

145 Saponins are glycosylated triterpenoids, generated in many plants as a secondary  
146 metabolite. Different saponins display potent insecticidal and fungicidal activities  
147 against a broad range of plant parasites (20, 21). Unlike dicotyledonous plants,  
148 monocots such as rice are considered triterpenoid-poor plants (22). Avenacin is a  
149 saponin in oat (*Avena* spp) that provides defense against soil-borne fungal pathogens .  
150 Bayogenin 3-O-cellobioside is a glycosylated saponin, consisting of a non-sugar  
151 aglycone (Bayogenin) linked to a sugar glycone (Cellobioside). Because Bayogenin  
152 3-O-cellobioside is not commercially available, we tested both non-glycosylated  
153 Bayogenin and glycosylated Bayogenin (Bayogenin 3-O- $\beta$ -D-glucopyranoside) in an  
154 *in vitro* conidia germination and appressorium formation assays. We prepared  
155 titrations of these compounds and used them to wash conidia produced by the *P*  
156 *oryzae* Guy11 strain. Subsequently, we prepared conidia suspensions and inoculated a  
157 hydrophobic coverslip. We observed a dose-dependent inhibition of conidia  
158 germination and appressorium formation *in vitro* with increasing concentrations of  
159 Bayogenin 3-O- $\beta$ -D-glucopyranoside (5 nM/L-100 nM/L) (Figure.3 C and G). In  
160 contrast, increasing the concentrations of the non-glycosylated Bayogenin did not  
161 affect germination or appressorium formation, nor did the control treatments (Figure.3  
162 D and G D).

163 To ascertain whether other saponins would similarly inhibit conidia germination  
164 and appressorium formation, we used the *in vitro* assays to test two closely related  
165 saponins, Hedegeranin, and Oleanolic acid. Despite their reported insecticidal effects  
166 (23, 24), we found that washing conidia with 5-100 nM/L of Hedegeranin or  
167 Oleanolic acid did not adversely affect conidia germination and appressorium  
168 morphogenesis of *P oryzae in vitro* (Figure.3 E, F, and G). Together, these findings  
169 suggest that glycosylated Bayogenin, such as the Bayogenin 3-O-cellobioside, and  
170 Bayogenin 3-O- $\beta$ -D-glucopyranoside are potent phytochemicals that specifically  
171 inhibit infectious development of *P oryzae*.

172

173

174

175 **Differential expression of steroid biosynthesis enzymes during rice-*P. oryzae***  
176 **interaction**

177 Genes encoding enzymes involved in steroid biosynthesis, including  $\beta$ -amyrin  
178 synthases, uridine diphosphate (UDP) glucuronyltransferases/ glycosyltransferases  
179 (UDP/GTs), appear to mediate the biosynthesis of saponins in plants (22, 25, 26). We  
180 identified a total of 6 rice  $\beta$ -amyrin synthases and 145 putative rice-specific UDP-GTs  
181 from the publicly available glycosyltransferase database (27). Our bioinformatics  
182 analysis revealed that the rice UDP-GTs family could be classified into 33  
183 sub-families (groups) based on the alignment of a shared motif (Figure.4A). Further,  
184 75 of this putative rice UDP-GTs are within genes clusters on multiple chromosomes  
185 (Figure. 4B).

186 We hypothesized that increased expression of either  $\beta$ -amyrin synthases or UDP-GTs  
187 might support the increased production of Bayogenin 3-O-cellobioside in rice  
188 seedlings inoculated with *P. oryzae*. To examine how inoculation affects the  
189 expression of these genes in different cultivars, we analyzed resistant (Pi-gm) and  
190 susceptible (CO39, NPB) seedlings by RNA sequencing. We found that of the 102  
191 UDP-GTs were expressed exclusively upon inoculation of Pi-gm, whereas 83 and 13  
192 UDP-GTs were expressed exclusively upon inoculation of CO39 and NPB,  
193 respectively (Fig.7C) and (see Supplementary Table 3). Also, two  $\beta$ -amyrin synthase  
194 genes were significantly (~5-12 fold) up-regulated in Pi-gm and CO39 rice cultivars  
195 in response to *P. oryzae* challenge (Figure.4D). Thus, various UDP-GT and  $\beta$ -amyrin  
196 synthase genes are expressed only upon inoculation of rice with *P. oryzae*, in both  
197 susceptible and resistant seedlings. Our findings also underscore the importance of  
198  $\beta$ -amyrin synthases and UDP-GTs in enforcing host immunity (28, 29). This  
199 clustering, and the observation that a higher number of UDP-GT genes are expressed  
200 upon inoculation of resistant cultivars compared to susceptible cultivars suggesting



201 that multiple UDP-GTs enhance rice immunity against blast fungus by producing  
202 diverse glycosides, likely including Bayogenin 3-O-cellobioside. Disruption of a  
203  $\beta$ -amyrin synthase and UDP-GTs blocks avenacin biosynthesis in oat (30, 31).  
204 However, the extent to which  $\beta$ -amyrin synthases and UDP-GTs influence Bayogenin  
205 3-O-cellobioside biosynthesis, as well as the resistance or susceptibility of different  
206 rice cultivars to *P. oryzae*, remains to be determined.

207

208

209 **DISCUSSION**

210

211 We report that the rice metabolite Bayogenin 3-O-cellobioside (saponin) is a novel,  
212 general defense molecule that accumulates exclusively in response to *P. oryzae*  
213 infection, in susceptible and resistant rice cultivars from both japonica and indica  
214 lineages. Further, the levels of Bayogenin 3-O-cellobioside after inoculation with *P.*  
215 *oryzae* directly correlate with the resistance of the rice cultivars. Therefore,  
216 susceptible and resistant rice cultivars display metabolomic differences not only  
217 before infection but also after infection, which contribute to differential resistance to  
218 rice blast pathogen.

219

220 Saponins are glycosylated triterpenoids, generated in many plants as a secondary  
221 metabolite. Different saponins display potent insecticidal and fungicidal activities  
222 against a broad range of plant parasites (20, 21, 32). Unlike dicotyledonous plants,  
223 monocots such as rice are considered triterpenoid-poor plants (22). Avenacin is a  
224 saponin in oat (*Avena* spp.) that provides defense against soil-borne fungal pathogens  
225 (33). To our knowledge, Bayogenin 3-O-cellobioside represents the first example of a  
226 saponin produced in rice.

227

228  $\beta$ -amyrin synthases and UDP-GTs are key enzymes involved in the biosynthesis of  
229 saponins in plants (34-36). We found that two out of four putative  $\beta$ -amyrin synthases  
230 genes and a total of 106 putative UDP-GTs were specifically expressed during rice  
231 blast fungus infection of different cultivars. These data suggest that rice, and likely  
232 other monocots, are genetically capable of generating saponins and other glycosylated  
233 steroids under defined conditions.

234

235 Our findings also underscore the importance of  $\beta$ -amyrin synthases and UDP-GTs in  
236 enforcing host immunity (28, 29, 37). The clustering of rice UDP-GTs at single loci  
237 on a limited number of chromosomes suggests that clusters are likely controlled by a  
238 common regulator (38, 39). This clustering, and the observation that a higher number

239 of UDP-GT genes are expressed upon inoculation of resistant cultivars compared to  
240 susceptible cultivars, suggests that multiple UDP-GTs enhance rice immunity against  
241 blast fungus by producing diverse glycosides, likely including Bayogenin  
242 3-O-cellobioside. Disruption of a  $\beta$ -amyrin synthase and UDP-GTs blocks avenacin  
243 biosynthesis in oat (30, 31). The extent to which  $\beta$ -amyrin synthases and UDP-GTs  
244 influence Bayogenin 3-O-cellobioside biosynthesis, as well as the resistance or  
245 susceptibility of different rice cultivars to *P. oryzae*, remains to be determined.

246

247 Bayogenin 3-O-cellobioside is a glycoside consisting of a non-sugar aglycone  
248 (Bayogenin) linked to a sugar glycone (cellobioside) (40). Glycosylation is required to  
249 transform saponins to their bioactive state (41, 42). We found that spores from rice  
250 blast fungus treated with glycosylated Bayogenin (Bayogenin  
251 3-O- $\beta$ -D-glucopyranoside) failed to germinate whereas spores treated with  
252 non-glycosylated Bayogenin germinated and progressed to form functional  
253 appressorium. The aglycone component of insecticidal saponins is not sufficient to  
254 prevent *Phyllotreta nemorum* from feeding on the tissues of susceptible P-type of  
255 *Barbarea vulgaris* (43). Similarly, glycosylation plays a crucial role in promoting the  
256 fungicidal activities of Bayogenin.

257

258 Glycosides contribute to plant resistance against a broad range of parasitic insects and  
259 herbivores (44). However, the glycosides Hederagenin, and Oleanolic acid, did not  
260 inhibit spore germination or development of rice blast fungus. Bayogenin  
261 3-O- $\beta$ -D-glucopyranoside, on the other hand, significantly inhibited the germination  
262 of *P. oryzae* spores, but did not adversely affect vegetative development of rice blast  
263 fungus (data not shown), though there is limited knowledge on the evolution of  
264 saponin biosynthesis in different plant families (45). Differences in saponin  
265 bioactivity could be due to the composition of the core structure, functional groups,  
266 and the affinity with which these amphiphilic compounds integrate and disrupt the  
267 integrity of the targeted biological membrane systems (32, 45). Glycosylated

268 Bayogenin (specifically Bayogenin 3-O-cellobioside) appears to be a novel and potent  
269 anti-fungal metabolite generated in both susceptible and resistant rice cultivars,  
270 providing a chemical defense against rice blast fungus. Soyasapogenol glycosides  
271 (*Lupinus angustifolius* L) and avenacin A (*Avena strigose*) display specific antifungal  
272 activity against *Candida albicans* and *Gaeumannomyces graminis* var. *tritici*,  
273 respectively, without a corresponding insecticidal effect(41, 46).

274

## 275 **Conclusion**

276

277 Inherent metabolite differences between distinct rice cultivars have been associated  
278 with their distinct morphological and physiological characteristics (47-49). However,  
279 little is known about pathogen-induced metabolite differences between various rice  
280 cultivars and the potential impact on resistance or susceptibility traits. Beyond  
281 Bayogenin 3-O-Cellobioside, we found that other previously reported defense-related  
282 metabolites, such as abscisic acid glucoside ester (50),  
283 aurantio-obtusin- $\beta$ -D-glucoside(51), carlinoside (52, 53) and sakuranin (derivative of  
284 sakuranetin ) (54-57), were specifically produced in resistant rice cultivars challenged  
285 with rice blast fungus. Thus, resistant rice cultivars possess a metabolomic advantage  
286 over susceptible rice cultivars both before and during infection.

287 Overall, we report for the first time that diverse cultivars of rice produce a novel  
288 saponin (Bayogenin 3-O-Cellobioside) with anti-blast properties upon rice blast  
289 infection. We propose that  $\beta$ -amyrin synthases and/or UDP-GTs support saponin  
290 biosynthesis in rice (Fig.5). Our study provides insight into pathogen-mediated  
291 metabolomic reprogramming in host plants, and its impact on the resistant or  
292 susceptibility. The correlation between Bayogenin 3-O-Cellobioside levels and blast  
293 resistance suggests that engineering saponin expression in cereal crops represents an  
294 attractive and sustainable disease control strategy.

295

296

297

## 298 **Materials and Methods**

### 299 **1. Preparation of rice samples for metabolomics assay**

300 2-3-week-old rice seedlings were sprayed-inoculated with conidia suspensions  
301 ( $1.5\text{-}2.0 \times 10^5$  conidia/mL containing 0.02% Tween20) and incubated in a humid  
302 chamber along with the control groups (sprayed with water containing 0.02%  
303 Tween20) for 12 hours at 27 °C. Leaf tissues were harvested from respective groups  
304 separately (inoculated and non-inoculated groups) 12 hours post-inoculation. The  
305 harvested leaf tissues were ground in liquid nitrogen to yield a fine and  
306 homogeneously blended powder. 0.1 g of the leaf powder was mixed with 1000 µl of  
307 50% methanol and incubated in shaking incubator for 12 hours at 4 °C. The contents  
308 were centrifuged at 13000 rpm for 15 minutes at 4 °C. The supernatant was pipetted  
309 into new eppendorf tubes and 15 µl of the extracts were diluted 10-fold with 70% (v/v)  
310 cold methanol and filtered with 0.2µm Millex Millipore membrane into sample bottles  
311 with glass insert. The diluted extracts were stored at 4 °C and were later used for  
312 non-targeted whole-metabolome analysis. Whole-metabolome profiling data was  
313 generated with 2777 C UPLC system (Waters, UK) type of Liquid chromatography  
314 and Xevo G2-XS QTOF (Waters, UK) mass spectrometry instruments (BGI.Tech  
315 metabolomics platform at ShengZheng). The HPLC assay was conducted with six  
316 technical replicates.

317

### 318 **2. Culturing and preparation of *Magnaporthe oryzae* mycelia for Metabolomic**

#### 319 **Assay**

320 Wild-type *P. oryzae* Guy11 samples for metabolomics assays were cultured in  
321 complete liquid media (CM) (6 g yeast extract, 6 g casamino acid, 10 g sucrose in 1L  
322 distilled water) in a shaking incubator operating at 150 rpm at 28.5 °C for 5 days. The  
323 cultured strains were subsequently filtered and thoroughly rinsed with sterilized  
324 double deionized water (ddH<sub>2</sub>O) and freeze-dried in 70% (v/v) methanol for 24 hours  
325 in (Labconco Free Zone 12L). The dried hyphae tissues were ground into powder  
326 using a pestle and mortar. 0.16 mg of the ground hyphae was mixed with 1.5mL of

327 50% (v/v) methanol, vortexed vigorously to yield a uniform mixture, and incubated in  
328 a water bath at 65°C for 1 hour. After incubation, the mixture was centrifuged for 10  
329 minutes at 12000 rpm. The supernatant was aliquoted into a new 2.0 mL sterilized  
330 eppendorf tube, 15µL of the supernatant was diluted 10-fold with 70% (v/v) methanol  
331 and filtered with 0.2µm Millex Millipore membrane into sample bottles with glass  
332 insert and stored at 4°C for metabolic analysis.

333

### 334 **3. Harvesting and preparation of conidia for metabolomic Assay**

335 To generate conidia for metabolomics analysis, a mycelial plug of Wild-type *P. oryzae*  
336 Guy11 strains were grown on rice bran medium, at 27°C with constant exposure to  
337 light. After 10 days the conidia were harvested, washed with sterile distilled water,  
338 and was observed under the microscope. The washed conidia were then filtered and  
339 centrifuged for 10 minutes at 12000 rpm. The conidia were ground in liquid-nitrogen  
340 to yield fine powdered. 0.10 mg of the conidia powder was mixed with 1.5mL of 50%  
341 (v/v) methanol, vortexed vigorously to yield a uniform mixture and incubated in a  
342 water bath at 65°C for 1 hour. After incubation, the mixture was centrifuged for 10  
343 minutes at 12000 rpm. The supernatant was aliquoted into a new 2.0 mL sterilized  
344 Eppendorf tube, 15µL of the supernatant was diluted 10-fold with 70% (v/v) methanol  
345 and filtered with 0.2µm Millex Millipore membrane into sample bottles with glass  
346 insert and stored at 4°C for metabolic analysis.

347

### 348 **4. Generation of Appressorium for Metabolomic assays**

349 For appressorium formation metabolome profiling, appressoria were generated by  
350 dropping an aliquot of 1.0 mL per of conidia suspension ( $1 \times 10^5$ ) on fisher scientific  
351 hydrophobic slide surface and incubated in a humid chamber at 26°C without light.  
352 Appressorium formation was observed after 12 hours using an optical microscope.  
353 Solution drops containing the developed appressorium were pipetted into sterilized  
354 EP-tubes and centrifuged for 5 minutes at 5000 rpm. The liquid was pipetted-out and  
355 the pellet was transferred, frozen and ground in liquid nitrogen to yield a fine powder

356 using pestle and mortar. 0.10 mg of the powder generated was mixed with 1.5mL of  
357 50% (v/v) methanol, vortexed vigorously to yield a uniform mixture and incubated in  
358 a water bath at 65 °C for 1 hour. After incubation, the mixture was centrifuged for 10  
359 minutes at 12000 rpm. The supernatant was aliquoted into new 2.0 mL sterilized  
360 Eppendorf tubes, 15µL of the supernatant was diluted 10-fold with 70% (v/v)  
361 methanol and filtered with 0.2µm Millex Millipore membrane into sample bottles with  
362 glass insert and stored at 4 °C for metabolic analysis.

## 363 **5. Pathogenicity Assay**

364

365 For plant infection assays, conidia were collected from strains cultured on rice-bran  
366 medium for 7-10 days. Conidial suspensions were adjusted to  $1.5-2.0 \times 10^5$   
367 conidia/mL in 0.02% Tween solution and sprayed onto 3-4-week-old susceptible  
368 (*CO39*, *LTH* & *NPB*) and resistant (*Pi-b*, *Pi-4b*, & *Pi-gm*) rice seedlings. Inoculated  
369 plants were incubated in a dark, humid chamber at 25 °C for 24 hours, and then moved  
370 to another humid chamber with a 12 hour photoperiod. The plants were examined for  
371 disease symptoms at 7-days post-inoculation.

372

## 373 **6. Evaluating the influence of rice leaf extracts on conidia germination and** 374 **appressorium formation**

375 Conidia were collected from 7-day-old rice-bran medium. Conidial suspensions were  
376 adjusted to  $1.5-2.0 \times 10^5$  conidia/mL in 0.02% Tween solution and sprayed onto  
377 3-4-week-old susceptible (*CO39*, *LTH* & *NPB*) and resistant (*Pi-b*, *Pi-4b*, & *Pi-gm*)  
378 rice seedlings. Inoculated plants were incubated in a dark, humid chamber at 25°C for  
379 24 hours, then moved to another humid chamber with 12 hour photoperiod. The  
380 inoculated rice leaves were then grounded in liquid nitrogen into a fine powder. About  
381 1g of crushed leaves were dissolved in 4 ml of 80% methanol and incubated at 4 °C  
382 on a shaking incubator overnight. After overnight shaking, the mixture was  
383 centrifuged for 10 minutes at 13000 g to obtain the supernatant. The supernatant was

384 then filtered with non-sterilized millex syringe driven membrane. The substrate syrup  
385 was used to directly wash conidia from the culture plates. 20 uL of the conidia  
386 suspensions was placed on a fisher scientific hydrophobic microscope cover glass and  
387 incubated in a dark humid chamber at 26°C before proceeding to appressorium  
388 formation.

389

## 390 **7. RNA extraction and generation of Illumina RNA sequencing library**

391 Total RNA was extracted from the inoculated rice seedlings (C\_Co39, C\_NPB, and  
392 C\_gm) along with their non-inoculated control group T\_Co39, T\_NPB, and T\_gm.  
393 The extraction of total RNA from inoculated and non-inoculated control samples was  
394 carried-out with RNeasy pure Plant Kit (Qiagen, Beijing) by following processes  
395 recommended by the manufacturer. RNA degradation and contamination were  
396 measured by running the extracted RNAs on 1% agarose gels. RNA integrity was  
397 assessed using the RNA Nano 6000 Assay Kit of the Bioanalyzer 2100 system  
398 (Agilent Technologies, CA, USA). The RNA concentration was measured with an  
399 RNA Assay Kit in Qubit 2.0 Fluorometer (Life Technologies, CA, USA). The RNA  
400 concentration was measured with an RNA Assay Kit in Qubit 2.0 Fluorometer (Life  
401 Technologies, CA, USA)The cDNA library was sequenced on the Illumina  
402 sequencing platform (IlluminaHiSeq 2000) with 150 bp pair-end reads length and 300  
403 bp insert size by Gene Denovo Co. (Guangzhou, China). Novogene in-house Perl  
404 script was used to select clean reads by removing adaptor sequences, low-quality  
405 sequences (reads with more than 50% of bases quality lower than 20) and reads with  
406 more than 5% N bases. The reference genome of Nipponbare genome *Oryza sativa*  
407 Japonica and gene model annotation files were downloaded from the genome website  
408 directly (58). Index of the reference genome was built using Hisat2 v2.0.4, and  
409 paired-end clean reads were aligned to the reference genome using Hisat2 v2.0.4. We  
410 selected Hisat2 as the mapping tool for that Hisat2 can generate a database of splice  
411 junctions based on the gene model annotation file and thus a better mapping result  
412 than other non-splice mapping tools.



413 **Additional information**

414 Accession codes: Details of the RNA-Seq data generated in this study have been  
415 deposited in the NCBI Sequence Read Archive database and can be accessed with the  
416 accession code: GSE126961

417 **Acknowledgements**

418 This work was supported by National Natural Science Foundation of China  
419 (No.U1805232, No.31770156) and National Key Research and Development Program  
420 of China (2016YFD0300707)  
421

## 422 Reference

- 423 1. Uda M, *et al.* (2018) Antimicrobial Activity of Plant Extracts from Aloe Vera, Citrus  
424 Hystrix, Sabah Snake Grass and Zingiber Officinale against Pyricularia Oryzae that  
425 causes Rice Blast Disease in Paddy Plants. *IOP Conference Series: Materials Science  
426 and Engineering*, (IOP Publishing), p 012009.
- 427 2. Zhong Z, *et al.* (2018) Population genomic analysis of the rice blast fungus reveals  
428 specific events associated with expansion of three main clades. *The ISME journal*:1.
- 429 3. Dean RA, *et al.* (2005) The genome sequence of the rice blast fungus Magnaporthe  
430 grisea. *Nature* 434(7036):980.
- 431 4. Marcel S, Sawers R, Oakeley E, Angliker H, & Paszkowski U (2010) Tissue-adapted  
432 invasion strategies of the rice blast fungus Magnaporthe oryzae. *The Plant Cell*  
433 22(9):3177-3187.
- 434 5. Wilson RA & Talbot NJ (2009) Under pressure: investigating the biology of plant  
435 infection by Magnaporthe oryzae. *Nature Reviews Microbiology* 7(3):185.
- 436 6. Howard RJ & Valent B (1996) Breaking and entering: host penetration by the fungal  
437 rice blast pathogen Magnaporthe grisea. *Annual Reviews in Microbiology*  
438 50(1):491-512.
- 439 7. Fernandez J & Orth K (2018) Rise of a Cereal Killer: The Biology of Magnaporthe  
440 oryzae Biotrophic Growth. *Trends in microbiology*.
- 441 8. Promchuay A, Nilthong S, & Jantasuriyarat C (2017) Investigation of Pid3 Rice Blast  
442 Resistant Gene in Northern Upland Rice Varieties (*Oryza sativa* L.), Thailand Using  
443 Molecular Markers. *Journal of Advanced Agricultural Technologies Vol* 4(3).
- 444 9. Huang C-L, Hwang S-Y, Chiang Y-C, & Lin T-P (2008) Molecular evolution of the Pi-ta  
445 gene resistant to rice blast in wild rice (*Oryza rufipogon*). *Genetics* 179(3):1527-1538.
- 446 10. Deng Y, Zhu X, Shen Y, & He Z (2006) Genetic characterization and fine mapping of  
447 the blast resistance locus Pigm (t) tightly linked to Pi2 and Pi9 in a broad-spectrum  
448 resistant Chinese variety. *Theoretical and applied genetics* 113(4):705-713.
- 449 11. Bao J, *et al.* (2017) PacBio sequencing reveals transposable elements as a key  
450 contributor to genomic plasticity and virulence variation in Magnaporthe oryzae.  
451 *Molecular plant* 10(11):1465-1468.
- 452 12. Akatsuka T, Kodama O, Sekido H, Kono Y, & Takeuchi S (1985) Novel Phytoalexins  
453 (Oryzalexins A, B and C) Isolated from Rice Blast Leaves Infected with Pyricularia  
454 oryzae. Part I: Isolation, Characterization and Biological Activities of Oryzalexins Part  
455 II: Structural Studies of Oryzalexins. *Agricultural and biological chemistry*  
456 49(6):1689-1701.
- 457 13. Otomo K, *et al.* (2004) Diterpene cyclases responsible for the biosynthesis of  
458 phytoalexins, momilactones A, B, and oryzalexins A–F in rice. *Bioscience,  
459 biotechnology, and biochemistry* 68(9):2001-2006.
- 460 14. Ghazanfar MU, Habib A, & Sahi S (2009) Screening of rice germplasm against  
461 Pyricularia oryzae the cause of rice blast disease. *Pak. J. Phytopathol* 21(1):41-44.
- 462 15. Norvienyeku J, *et al.* (2017) Methylmalonate-semialdehyde dehydrogenase  
463 mediated metabolite homeostasis essentially regulate conidiation, polarized

- 464 germination and pathogenesis in *Magnaporthe oryzae*. *Environmental microbiology*  
465 19(10):4256-4277.
- 466 16. Hashimoto K, *et al.* (2009) Comprehensive analysis of glycosyltransferases in  
467 eukaryotic genomes for structural and functional characterization of glycans.  
468 *Carbohydrate research* 344(7):881-887.
- 469 17. Kim S, *et al.* (2018) PubChem 2019 update: improved access to chemical data.  
470 *Nucleic acids research* 47(D1):D1102-D1109.
- 471 18. Kumaraswamy KG, Kushalappa AC, Choo TM, Dion Y, & Rioux S (2011) Mass  
472 spectrometry based metabolomics to identify potential biomarkers for resistance in  
473 barley against fusarium head blight (*Fusarium graminearum*). *Journal of chemical*  
474 *ecology* 37(8):846-856.
- 475 19. Abuyusuf M, *et al.* (2018) Glucosinolate Profiling and Expression Analysis of  
476 Glucosinolate Biosynthesis Genes Differentiate White Mold Resistant and  
477 Susceptible Cabbage Lines. *International journal of molecular sciences* 19(12):4037.
- 478 20. Doughari J (2015) An overview of plant immunity. *J. Plant Pathol. Microbiol*  
479 6(11):10.4172.
- 480 21. Abbruscato P, *et al.* (2014) Triterpenoid glycosides from *medicago sativa* as  
481 antifungal agents against *Pyricularia oryzae*. *Journal of agricultural and food*  
482 *chemistry* 62(46):11030-11036.
- 483 22. Osbourn AE (2003) Saponins in cereals. *Phytochemistry* 62(1):1-4.
- 484 23. Cai F, *et al.* (2017) *Medicago truncatula* Oleanolic-Derived Saponins Are Correlated  
485 with Caterpillar Deterrence. *Journal of chemical ecology* 43(7):712-724.
- 486 24. Kortbeek RW, van der Gragt M, & Bleeker PM (2018) Endogenous plant metabolites  
487 against insects. *European Journal of Plant Pathology*:1-24.
- 488 25. Itkin M, *et al.* (2013) Biosynthesis of antinutritional alkaloids in solanaceous crops is  
489 mediated by clustered genes. *Science*:1240230.
- 490 26. Liu C, Ha CM, & Dixon RA (2018) Functional Genomics in the Study of Metabolic  
491 Pathways in *Medicago truncatula*: An Overview. *Functional Genomics in Medicago*  
492 *truncatula*, (Springer), pp 315-337.
- 493 27. Chandran AKN, *et al.* (2016) Updated Rice Kinase Database RKD 2.0: enabling  
494 transcriptome and functional analysis of rice kinase genes. *Rice* 9(1):40.
- 495 28. Wang Y, *et al.* (2016) Transcriptome profiling of Huanglongbing (HLB) tolerant and  
496 susceptible citrus plants reveals the role of basal resistance in HLB tolerance.  
497 *Frontiers in plant science* 7:933.
- 498 29. Boachon B, *et al.* (2014) Role of two UDP-Glycosyltransferases from the L group of  
499 *arabidopsis* in resistance against *pseudomonas syringae*. *European journal of plant*  
500 *pathology* 139(4):707-720.
- 501 30. Geisler K, *et al.* (2013) Biochemical analysis of a multifunctional cytochrome P450  
502 (CYP51) enzyme required for synthesis of antimicrobial triterpenes in plants.  
503 *Proceedings of the National Academy of Sciences* 110(35):E3360-E3367.
- 504 31. Tamura K, *et al.* (2017) Cytochrome P450 monooxygenase CYP716A141 is a unique  
505  $\beta$ -amyrin C-16 $\beta$  oxidase involved in triterpenoid saponin biosynthesis in *Platycodon*  
506 *grandiflorus*. *Plant and Cell Physiology* 58(5):874-884.

- 507 32. Augustin JM, Kuzina V, Andersen SB, & Bak S (2011) Molecular activities,  
508 biosynthesis and evolution of triterpenoid saponins. *Phytochemistry* 72(6):435-457.
- 509 33. Anderson JP, *et al.* (2010) Plants versus pathogens: an evolutionary arms race.  
510 *Functional plant biology* 37(6):499-512.
- 511 34. Suzuki H, Achnine L, Xu R, Matsuda SP, & Dixon RA (2002) A genomics approach to  
512 the early stages of triterpene saponin biosynthesis in *Medicago truncatula*. *The Plant*  
513 *Journal* 32(6):1033-1048.
- 514 35. Sui C, *et al.* (2011) Transcriptome analysis of *Bupleurum chinense* focusing on genes  
515 involved in the biosynthesis of saikosaponins. *BMC genomics* 12(1):539.
- 516 36. Tava A, Scotti C, & Avato P (2011) Biosynthesis of saponins in the genus *Medicago*.  
517 *Phytochemistry reviews* 10(4):459-469.
- 518 37. Qi X, *et al.* (2006) A different function for a member of an ancient and highly  
519 conserved cytochrome P450 family: from essential sterols to plant defense.  
520 *Proceedings of the National Academy of Sciences* 103(49):18848-18853.
- 521 38. Fischer J, Schroeckh V, & Brakhage AA (2016) Awakening of fungal secondary  
522 metabolite gene clusters. *Gene Expression Systems in Fungi: Advancements and*  
523 *Applications*, (Springer), pp 253-273.
- 524 39. Chen J, *et al.* (2017) Genomic and transcriptomic analyses reveal differential  
525 regulation of diverse terpenoid and polyketides secondary metabolites in *Hericium*  
526 *erinaceus*. *Scientific reports* 7(1):10151.
- 527 40. Hostettmann K & Marston A (2005) *Saponins* (Cambridge University Press).
- 528 41. Townsend B, Jenner H, & Osbourn A (2006) Saponin glycosylation in cereals.  
529 *Phytochemistry Reviews* 5(1):109-114.
- 530 42. Mugford ST & Osbourn A (2012) Saponin Synthesis and Function 28. *Isoprenoid*  
531 *Synthesis in Plants and Microorganisms: New Concepts and Experimental*  
532 *Approaches*:405.
- 533 43. Nielsen JK, Nagao T, Okabe H, & Shinoda T (2010) Resistance in the plant, *Barbarea*  
534 *vulgaris*, and counter-adaptations in flea beetles mediated by saponins. *Journal of*  
535 *chemical ecology* 36(3):277-285.
- 536 44. Mugford ST & Osbourn A (2012) Saponin synthesis and function. *Isoprenoid*  
537 *Synthesis in Plants and Microorganisms*, (Springer), pp 405-424.
- 538 45. Augustin JM, *et al.* (2012) UDP-glycosyltransferases from the UGT73C Subfamily in  
539 *Barbarea vulgaris* catalyse Sapogenin 3-O-glycosylation in Saponin-mediated Insect  
540 resistance. *Plant physiology*:pp. 112.202747.
- 541 46. Woldemichael GM & Wink M (2002) Triterpene glycosides of *Lupinus angustifolius*.  
542 *Phytochemistry* 60(4):323-327.
- 543 47. Hu C, *et al.* (2014) Metabolic variation between japonica and indica rice cultivars as  
544 revealed by non-targeted metabolomics. *Scientific reports* 4:5067.
- 545 48. Kusano M, *et al.* (2015) Using metabolomic approaches to explore chemical diversity  
546 in rice. *Molecular plant* 8(1):58-67.
- 547 49. Schauer N, *et al.* (2006) Comprehensive metabolic profiling and phenotyping of  
548 interspecific introgression lines for tomato improvement. *Nature biotechnology*  
549 24(4):447.

- 550 50. Piotrowska A & Bajguz A (2011) Conjugates of abscisic acid, brassinosteroids,  
551 ethylene, gibberellins, and jasmonates. *Phytochemistry* 72(17):2097-2112.
- 552 51. Kumar Y, *et al.* (2015) Metabolic profiling of chickpea-Fusarium interaction identifies  
553 differential modulation of disease resistance pathways. *Phytochemistry*  
554 116:120-129.
- 555 52. Ling Y & Weilin Z (2016) Genetic and biochemical mechanisms of rice resistance to  
556 planthopper. *Plant cell reports* 35(8):1559-1572.
- 557 53. Das S, *et al.* (2016) Variations in soil alter availability of carlinoside: an anti-hepatitic  
558 compound from *Cajanus cajan* (Linn.) leaves. *Current Science (00113891)* 110(11).
- 559 54. Kodama O, Miyakawa J, Akatsuka T, & Kiyosawa S (1992) Sakuranetin, a flavanone  
560 phytoalexin from ultraviolet-irradiated rice leaves. *Phytochemistry*  
561 31(11):3807-3809.
- 562 55. Hasegawa M, *et al.* (2014) Analysis on blast fungus-responsive characters of a  
563 flavonoid phytoalexin sakuranetin; accumulation in infected rice leaves, antifungal  
564 activity and detoxification by fungus. *Molecules* 19(8):11404-11418.
- 565 56. Gupta S, Ravindranath B, & Seshadri T (1972) Polyphenols of *Juglans nigra*.  
566 *Phytochemistry* 11(8):2634-2636.
- 567 57. Narasimhachari N & Seshadri T (1952) Components of the bark of *Prunus pudum*.  
568 *Proceedings of the Indian Academy of Sciences-Section A*, (Springer), p 202.
- 569 58. Sakai H, *et al.* (2013) Rice Annotation Project Database (RAP-DB): an integrative and  
570 interactive database for rice genomics. *Plant and Cell Physiology* 54(2):e6-e6.

571

572

573

1 Bayogenin 3-O-Cellobioside is a novel non-cultivar specific anti-blast metabolite  
 2 produced in rice in response to *Pyricularia oryzae* infection

3

4

List of Figures and Figure Legends

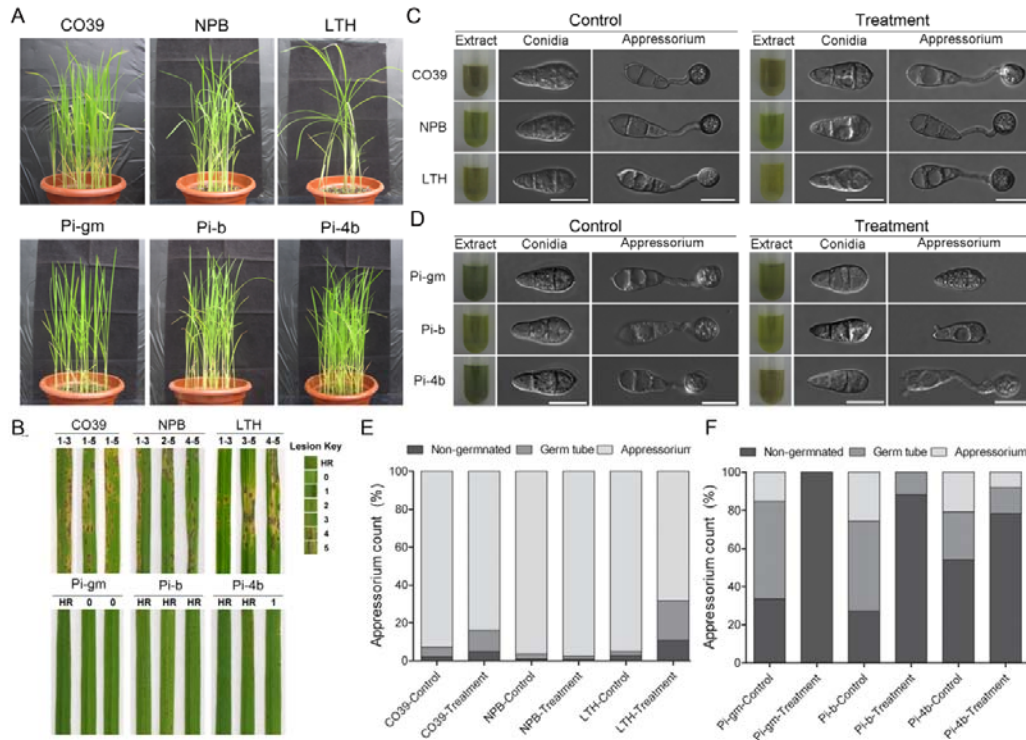

5

6 **Figure 1: Crude leaf extracts from pre-inoculated resistant rice cultivars significantly inhibits germination and**  
 7 **appressorium formation in *P. oryzae*.** (A). Showed blast symptoms and the susceptibility index of homogenously susceptible  
 8 rice cultivars sprayed inoculation with conidia suspensions of *P. oryzae*. (B) Showed the development blast symptoms and  
 9 resistance attributes displayed by moderate to completely resistant rice cultivars sprayed inoculation with conidia suspensions of  
 10 *P. oryzae*. Note hypersensitive response (HR)-0 represent complete resistance, lesion type 1-2 represent moderate resistance while  
 11 lesion type 3-5 signifies complete susceptibility.(C) Exhibit germination and appressorium formation characteristics of rice blast  
 12 fungus spores treated with total crude extracts obtained from pre-inoculated and non-inoculated susceptible rice cultivars. (D).  
 13 The micrograph display the inhibitory effects of total crude extracts obtained from pre-inoculated and non-inoculated resistant  
 14 rice cultivars on the germination of rice blast fungus spores. (E). The stacked column graph is a statistical presentation of *P.*  
 15 *oryzae* spores treated with total crude extracts from susceptible rice cultivars. (F). The stacked column graph is a statistical  
 16 presentation of *P. oryzae* spores treated with total crude extracts from resistant rice cultivars. Results for infection assay (A, B)  
 17 was obtained from three biological experiments with five technical replicates n=600 with a conidia concentration of  $3.0 \times 10^5$ .  
 18 Microscopy examination and statistical analysis, C, D, E, & F (n=750), Scale bars, 10  $\mu$ m.

19

20

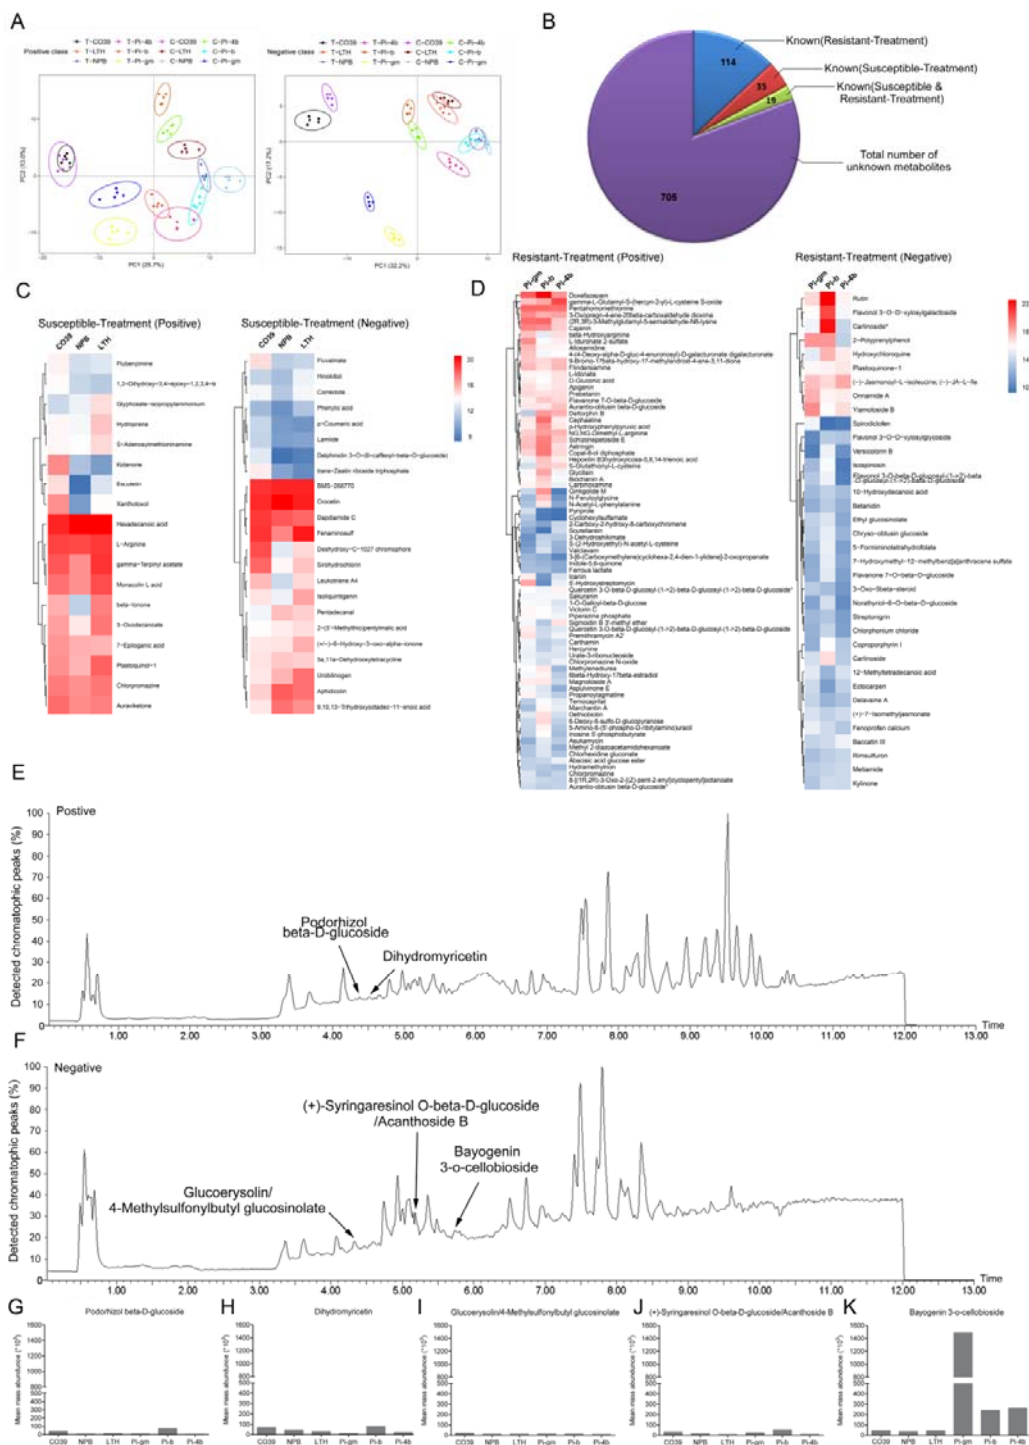

21

22 **Figure 2: Susceptible and resistant rice cultivars undergo common and differential metabolome reprogramming in**

23 **response to *P. oryzae* infection. (A).** PCA showed the number of common and differential metabolites recorded exclusively in

24 susceptible and resistant rice cultivars challenged with rice blast fungus under positive (Pos.+) ionization mode. (B). Showed the

25 number of common and different metabolites recorded in susceptible and resistant rice cultivars inoculated with the rice blast

26 fungus under both negative (Neg.<sup>-</sup>) and Pos.<sup>+</sup>) ionization mode. (C). The graphical matrix showed the list, clusters and abundance  
 27 intensity of metabolite generated exclusively in susceptible rice cultivars in response to rice blast fungus infection under (Neg.-)  
 28 ionization mode. (D). The heat-map showed names and cluster of unique metabolites identified exclusively in resistant rice  
 29 cultivars inoculated with *P. oryzae* under (Pos.<sup>+</sup>) ionization mode along with their comparative mass abundance intensities across  
 30 the respective cultivars. (E) Represent the chromatograph of metabolites identified exclusively in both susceptible and resistant  
 31 rice cultivars inoculated with the rice blast fungus under positive (Pos.<sup>+</sup>) ionization mode. (F) Displayed the chromatograph of  
 32 common metabolites identified in susceptible and resistant rice cultivars challenged with the rice blast fungus under negative  
 33 (Neg.<sup>-</sup>) ionization mode. (G-K). Displayed mass abundances recorded for non-cultivars specific metabolites identified in both  
 34 susceptible and resistant rice cultivars under under positive (Pos.<sup>+</sup>) and negative (Neg.<sup>-</sup>) ionization mode. Structures for the  
 35 respective metabolites are presented in supplementary figure 3. Metabolomics data was obtained from one one biological  
 36 replicate with six technical replicates (n= 240, seedling population per replicate =40). Metabolites with a mass abundance  $\geq$   
 37 1000, mass error  $\leq \pm 3$  T-test P-value (q-value)  $\leq 0.05$ , relative standard deviation (RSD)  $\leq 30\%$  est P-value (q-value)  $\leq 0.05$ ,  
 38 relative standard deviation (RSD)  $\leq 30\%$  and a minimum score of 25% were filtered and used for comparative metabolomics  
 39 analysis (A, B, C, & D). Quantitative inter-metabolomics variation between groups was analyzed with ANOVA (G, H, I, J,  
 40 &K).

41  
 42

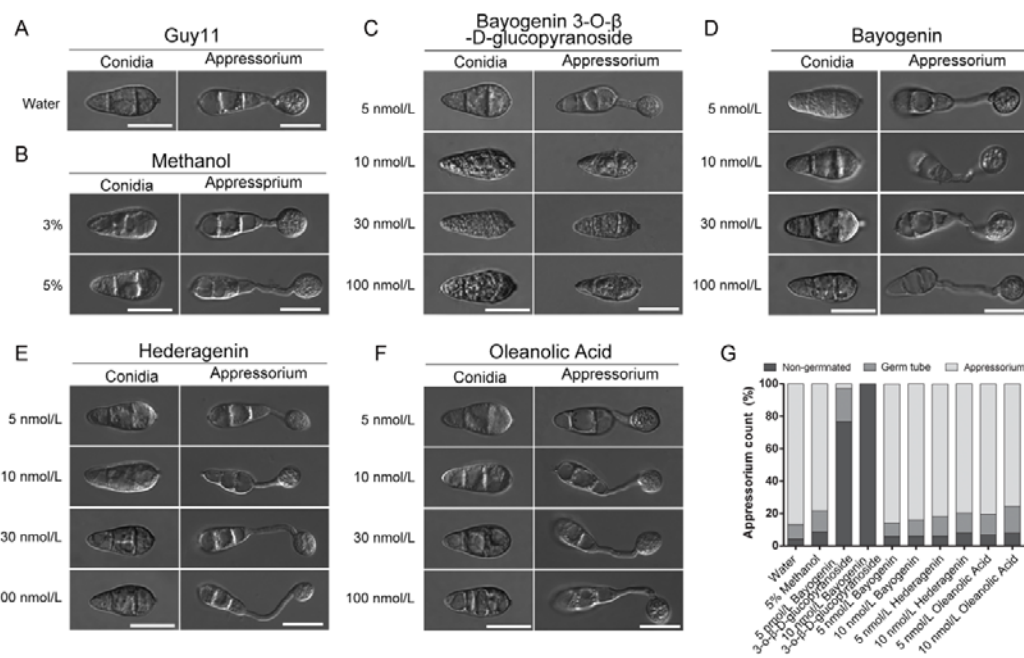

43



44 **Figure 3: Glycosylated Bayogenin exclusively inhibits the germination and appressorium formation in conidium**  
45 **produced by the rice blast fungus.** (A). Represents the negative control group that portrays the morphological characteristics of  
46 appressorium produced by *P. oryzae* conidia suspensions prepared with double deionized water (ddH<sub>2</sub>O). (B). Displayed the  
47 impact of 3% and 5% percent methanol on conidia germination and appressorium formation (positive control group). (C). The  
48 micrograph represents the inhibitory effects of different concentrations of glycosylated Bayogenin (Bayogenin  
49 3-O-β-D-glucopyranoside) on conidia germination and appressorium development. (D) Showed the influence of  
50 non-glycosylated Bayogenin on germ tube speciation and appressorium development in *P. oryzae*. (E) Showed the impact of  
51 Hedegeranin on conidia germination, and appressorium formation in *P. oryzae* conidium. (F). Showed germination and  
52 appressorium formation characteristics of *P. oryzae* conidia treated with Oleanolic acid. (G). The stacked column bar graph is a  
53 statistical display of the effect of different saponins on conidia germination and appressorium morphogenesis. Statistical  
54 computation was performed using average values obtained from three biological experiments with three replicate each time for  
55 all treatment (n=750). Scale bars, 10 μm.

56

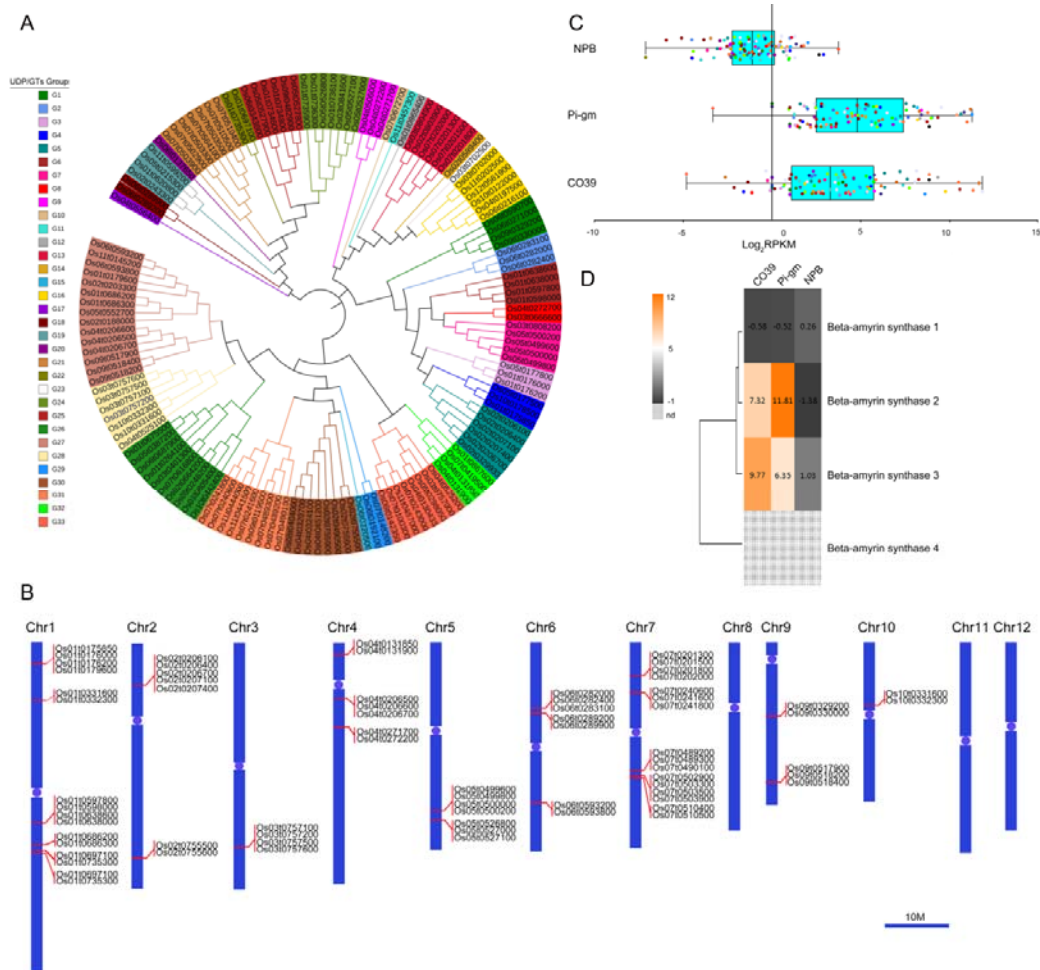

57  
 58 **Figure 4: Clustering and expression profile of putative saponin biosynthesis gene in rice during *P. oryzae* infection.** (A) the  
 59 Neighbor-joining tree showed the clustering 145 rice diphosphate glucuronyltransferases (UDP/GTs) into 33 different  
 60 sub-families (groups) based on conserved alignable motifs. Each group is defined by a colour shade and consists of 1-15 genes.  
 61 (B). Displayed the chromosomal distribution and locations of UDP/GTs gene clusters in rice. The blue each vertical bar with  
 62 upper and lower or (long and short) arms represent rice chromosome. The position of the blue circle (connecting the upper and  
 63 lower arms) on each chromosome indicate represent the centromeric region. The numbering (Chr1-Chr12) on top of each vertical  
 64 blue bar corresponds to Chromosome number. Set of genes aligned to red solid lines projecting from the chromosome represent a  
 65 single cluster, therefore the number of red solid lines on each chromosome reflects the number of UDP/GTs gene clusters  
 66 identified on the respective chromosome. (C). Showed the comparative expression pattern of 108 differentially expressed  
 67 UDP/GTs susceptible (CO39 and NPB) and resistant (Pi-gm) rice cultivars challenged with the rice blast fungus. Note the  
 68 expression these 106 was exclusively in response to infection and were not detected in the non-inoculated control groups. Each  
 69 coloured dot in or outside box plot represent the unique expression level ( $\log_2$  FPKM) of UDP/GTs gene in the treated rice  
 70 cultivars with a  $P \leq 0.05$ . The asterisks at the whiskers indicate the lower and upper outliers.

71

72

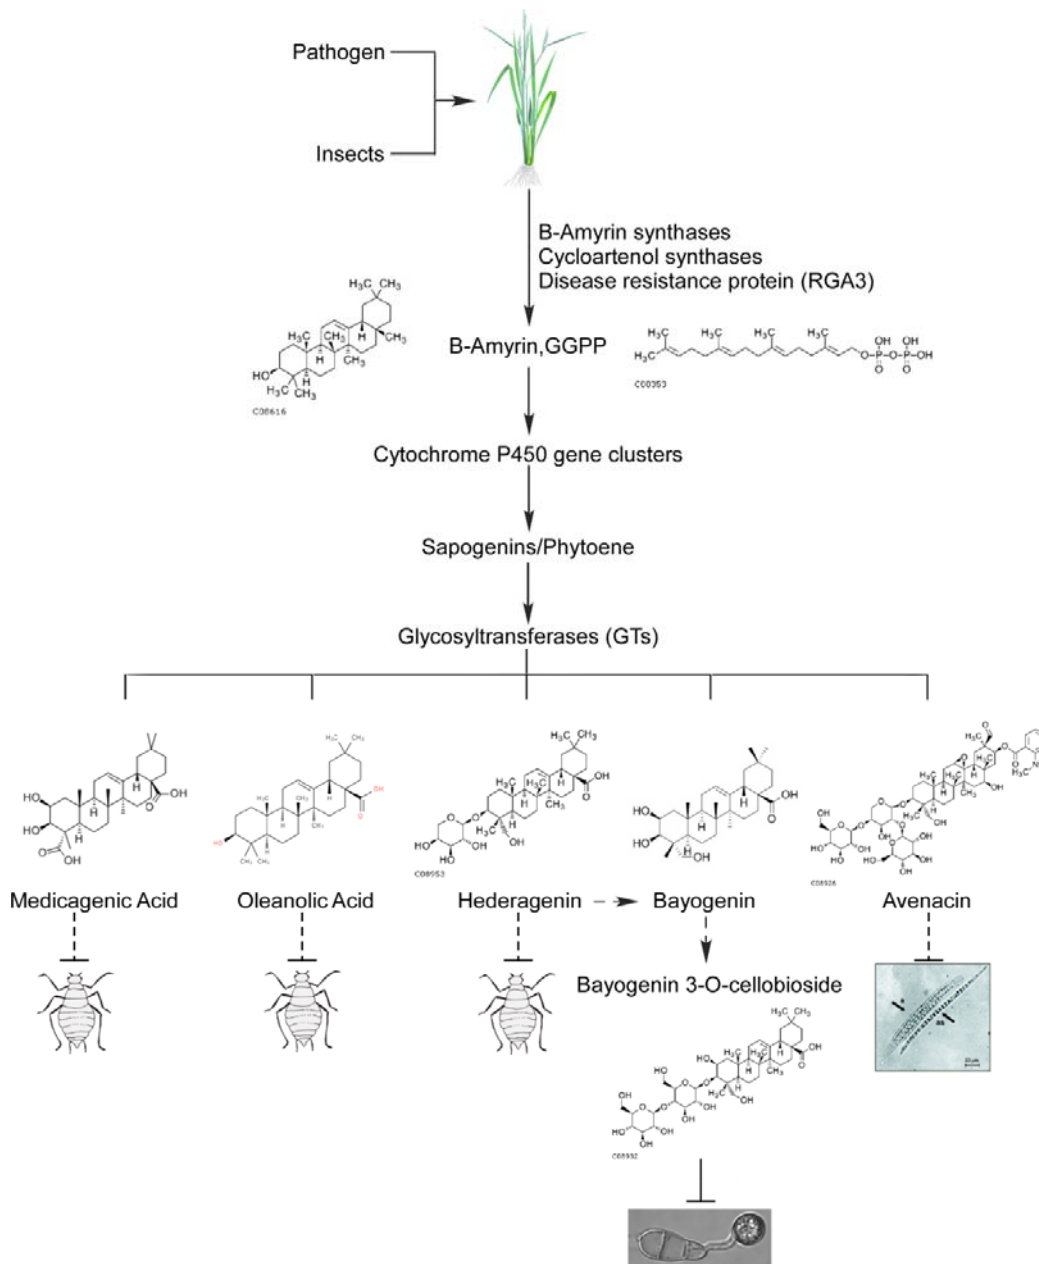

73

74 **Figure 5: Schematic representation of different types of saponins their exclusive insecticidal and fungicidal effects. *P.***  
 75 *oryzae* mediated metabolome-reprogramming result in the generation of Bayogenin 3-O-Cellobioside in resistant and susceptible  
 76 rice cultivars from both *japonica* and *indica* lineages combined enzymatic activities multiple diphosphate glucuronyltransferases  
 77 and β-amyrin synthases. Like avenacin, Bayogenin 3-O-Cellobioside represent a novel rice saponin with anti-blast effect.

78

79
